# Supplementary material
Source: PubMed Central journal article supplement (PMC6511070)
Supplement: NIHMS1018526-supplement-Supporting_Information.pdf [file NIHMS1018526-supplement-Supporting_Information.pdf]

# SUPPORTING INFORMATION

for

## Clinical-Scale Batch-Mode Production of Hyperpolarized Propane Gas for MRI

*Oleg G. Salnikov,<sup>a,b</sup> Panayiotis Nikolaou,<sup>c</sup> Nuwandi M. Ariyasingha,<sup>d</sup> Kirill V. Kovtunov,<sup>a,b</sup> Igor V. Koptuyug,<sup>a,b</sup> and Eduard Y. Chekmenev<sup>d,e\*</sup>*

<sup>a</sup>International Tomography Center, SB RAS, 3A Institutskaya St., Novosibirsk 630090, Russia

<sup>b</sup>Novosibirsk State University, 2 Pirogova St., Novosibirsk 630090, Russia

<sup>c</sup>Vanderbilt University Institute of Imaging Science (VUIIS), Department of Radiology, Vanderbilt University, Nashville, Tennessee 37232-2310, United States

<sup>d</sup>Department of Chemistry, Integrative Biosciences (Ibio), Wayne State University, Karmanos Cancer Institute (KCI), Detroit, Michigan 48202, United States

<sup>e</sup>Russian Academy of Sciences, Leninskiy Prospekt 14, Moscow 119991, Russia

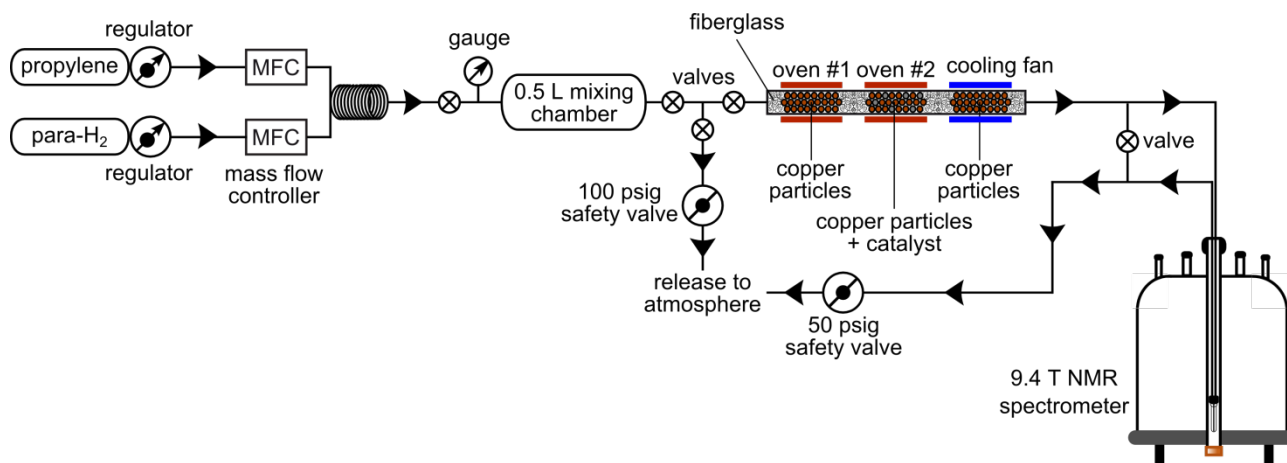

**Figure S1.** Scheme of experimental setup for batch-mode production and NMR detection of hyperpolarized propane gas.

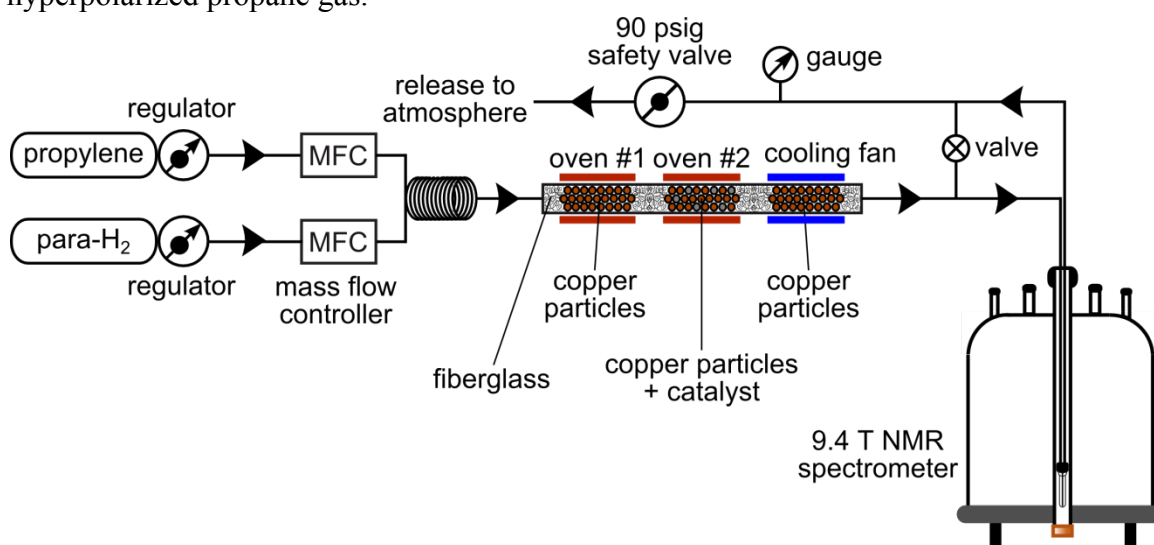

**Figure S2.** Scheme of experimental setup for continuous mode production and NMR detection of hyperpolarized propane gas.

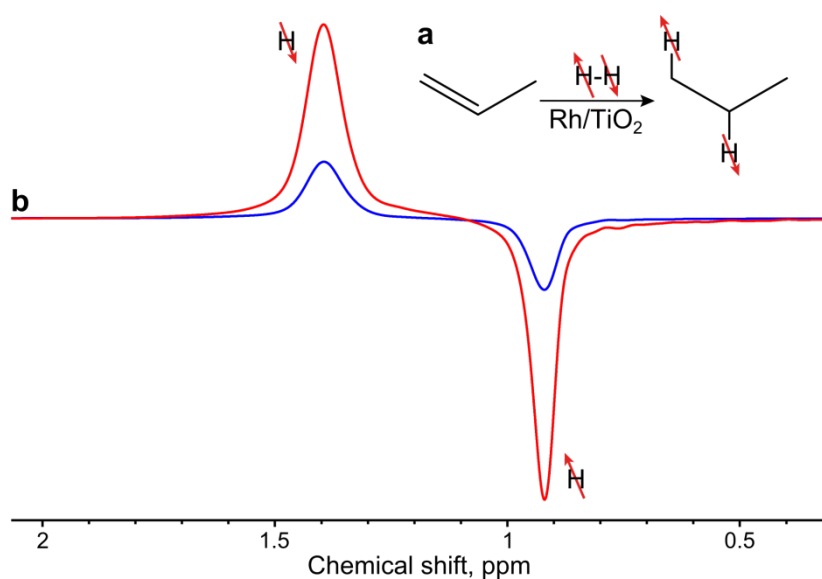

**Figure S3.** (a) Reaction scheme of pairwise addition of parahydrogen to propylene to form hyperpolarized propane. (b) ALTADENA  $^1\text{H}$  NMR spectra of continuously flowing HP propane gas

before (blue trace) and after (red trace) the catalyst employment in cyclopropane hydrogenation. Conditions: catalyst mass = 118 mg, T = 100 °C, P = 90 psig, gas flow rates 480 sccm for propylene and 960 sccm for p-H<sub>2</sub>.

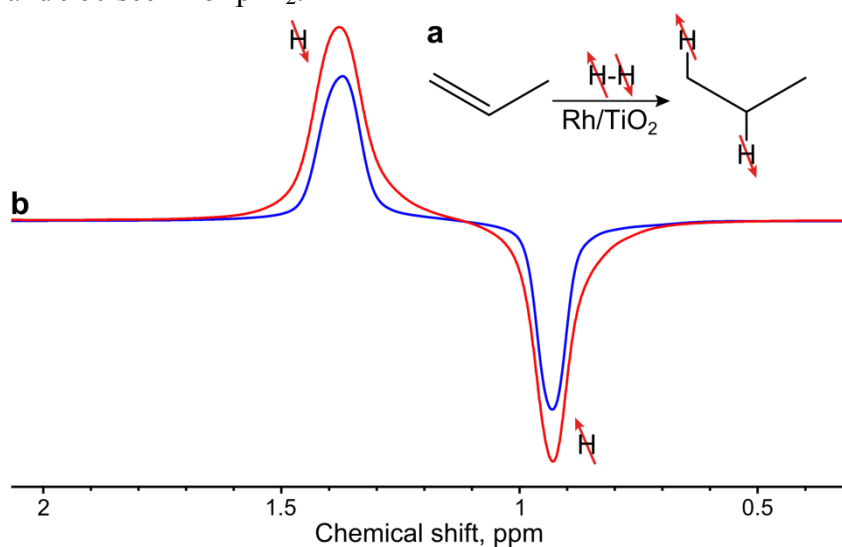

**Figure S4.** (a) Reaction scheme of pairwise addition of parahydrogen to propylene to form hyperpolarized propane. (b) ALTADENA <sup>1</sup>H NMR spectra of continuously flowing HP propane gas before (blue trace) and after (red trace) the catalyst employment in cyclopropane hydrogenation. Conditions: catalyst mass = 280 mg, T = 130 °C, P = 90 psig, gas flow rates 480 sccm for propylene and 960 sccm for p-H<sub>2</sub>.

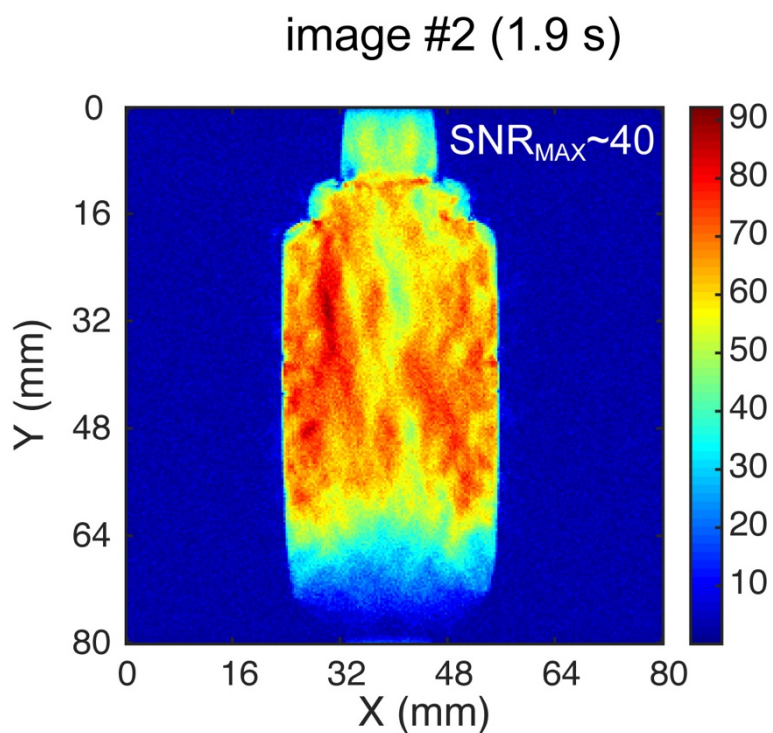

**Figure S5.** Enlarged version of the second image from the series of MRI HP propane images shown in Figure 4a.

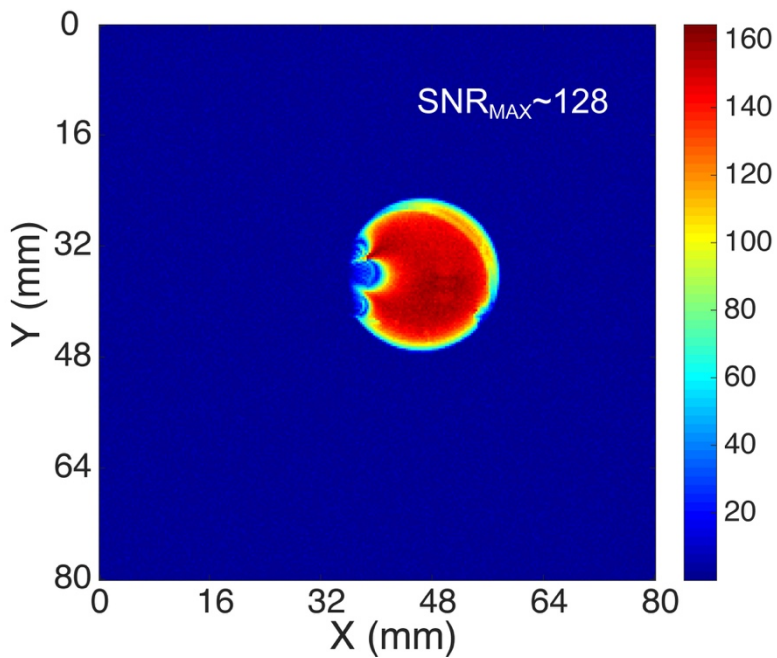

**Figure S6.** Corresponding image of thermally polarized neat water phantom for comparison with series of HP propane images shown in Figure 4a.
